# Supplementary material for: Quorum Sensing Activity and Hyphal Growth by External Stimuli in the Entomopathogenic Fungus Ophiocordyceps sinensis
Source: MDPI journal article supplement (doi:10.3390/insects11040205), 2020-03-26
Supplement: s1 [file s1]

*Insects*

## Supplementary Materials

# Quorum Sensing Activity and Hyphal Growth by External Stimuli in the Entomopathogenic Fungus *Ophiocordyceps sinensis*

Guiqing Liu <sup>1</sup>, Li Cao <sup>1</sup>, Xuehong Qiu <sup>1</sup> and Richou Han <sup>1,\*</sup>

Guangdong Key Laboratory of Animal Conservation and Resource Utilization, Guangdong Public Laboratory of Wild Animal Conservation and Utilization, Guangdong Institute of Applied Biological Resources, Guangzhou, China

Corresponding author: Prof. Richou Han, hanrc@giabr.gd.cn

Supplementary Materials

A

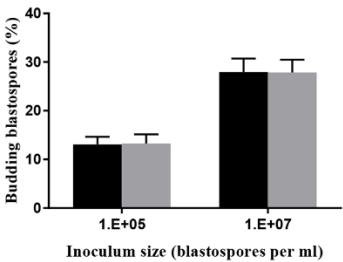

B

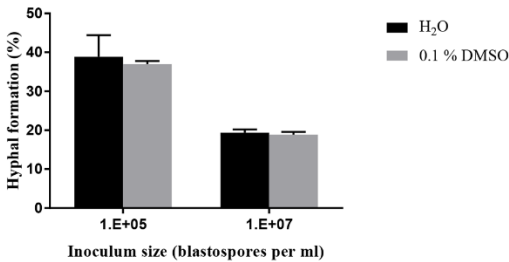

C

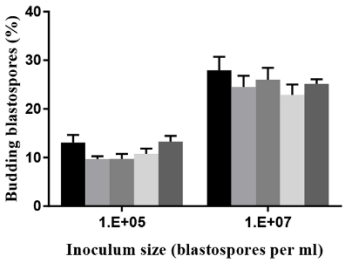

D

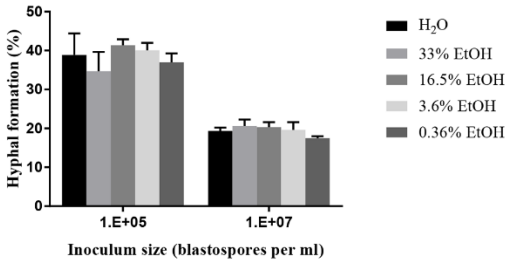

**Supplementary Figure S1.** Effect of solvent DMSO (A-B) and EtOH (C-D) on blastospores budding growth and hyphal formation.

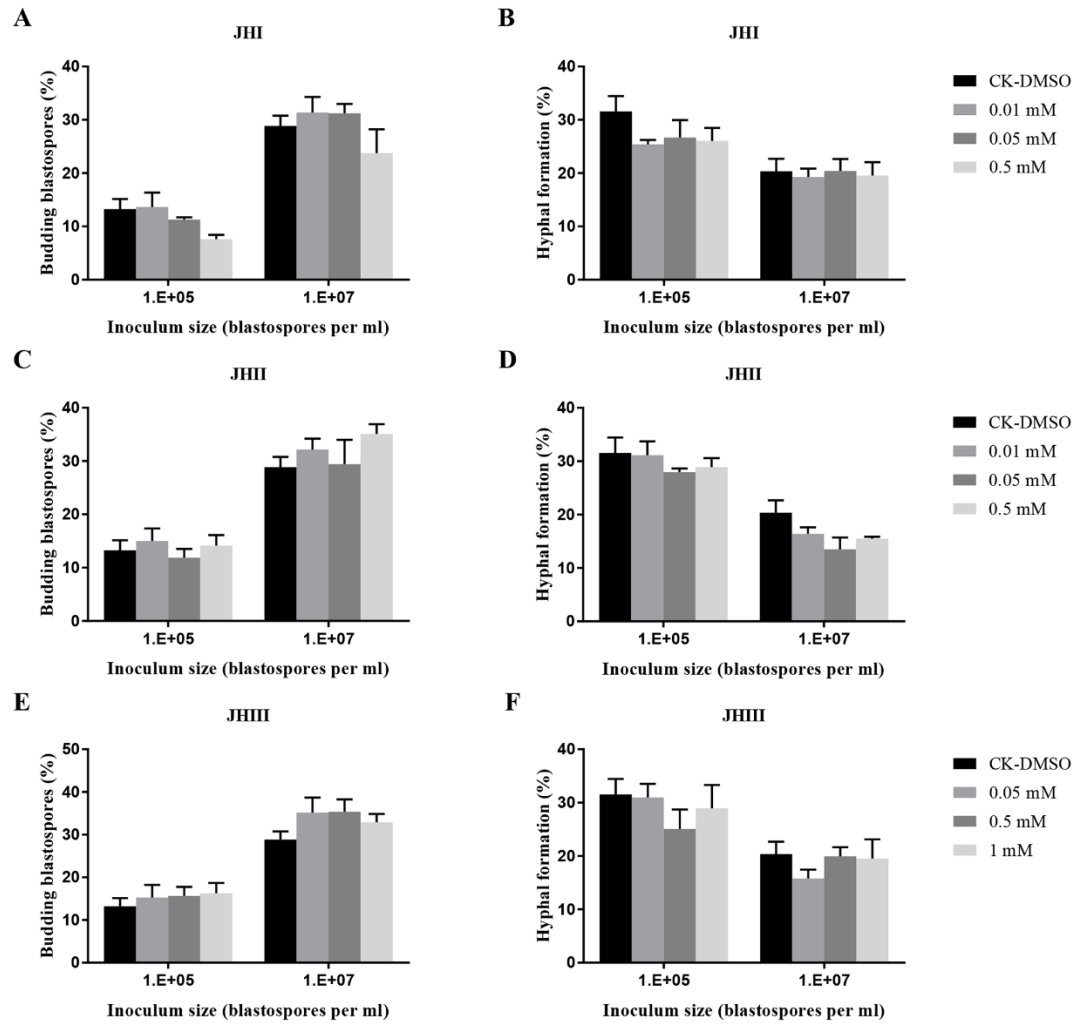

**Supplementary Figure S2.** Effect of insect hormones (JHI, JHII and JHIII) on blastospores budding growth (A, C, E) and hyphal formation (B, D, F).
